# Supplementary material
Source: Springer Nature journal article supplement (https://www.springermedizin.de/resource/supplementary/12936_2011_1761_MOESM4_ESM.pdf/9541664)

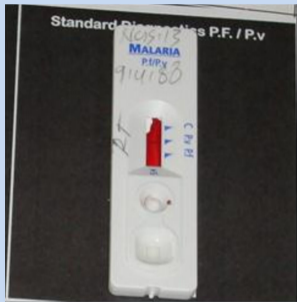

A

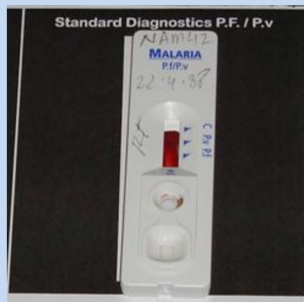

B

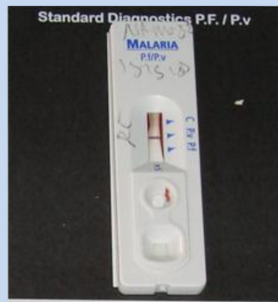

C

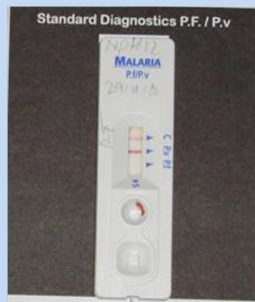

D

Supplement: MOESM4 [file 9541664]
